# Supplementary material for: Uniaxial thermal expansion-induced successively reversible thermochromism in zircon-type CaCrO4
Source: Royal Society of Chemistry journal article supplement (doi:10.1039/d4qi03326d), 2025-01-01

**Supplementary Information File for**

**Uniaxial Thermal Expansion Induced Successively Reversible  
Thermochromism in Zircon-Type  $\text{CaCrO}_4$**

Yanan Sun,<sup>a</sup> Fahua Guo,<sup>a</sup> Xuefeng Chu,<sup>b</sup> Haiyang Zhao,<sup>a,c</sup> Xiaotian Yang<sup>a,c</sup> Long Yuan,<sup>\*a,c</sup>

a. Key Laboratory of Functional Materials Physics and Chemistry of the Ministry of Education, College of Physics, Jilin Normal University, Changchun 130103, China.

b. Key Laboratory of Architectural Cold Climate Energy Management, Ministry of Education, Jilin Jianzhu University, Changchun 130118, China.

c. Jilin Provincial Key Laboratory of Wide Bandgap Semiconductor Material Growth and Device Applications, Jilin Normal University, Changchun 130103, China.

\*Corresponding email: yuanlong@jlnu.edu.cn (LY).

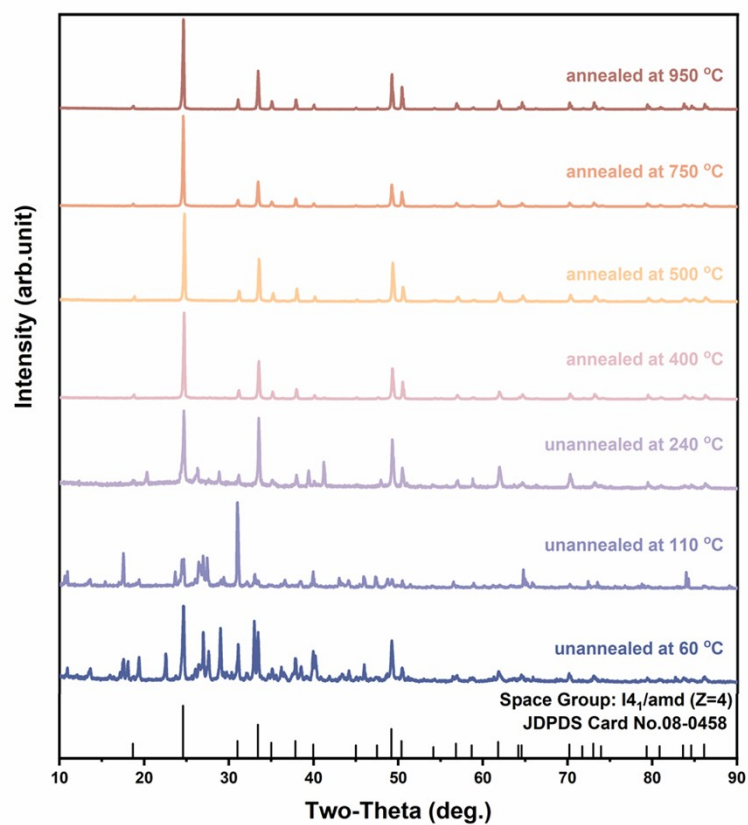

Figure S1. Powder X-ray diffraction results of  $\text{CaCrO}_4$  crystalized at different temperature.

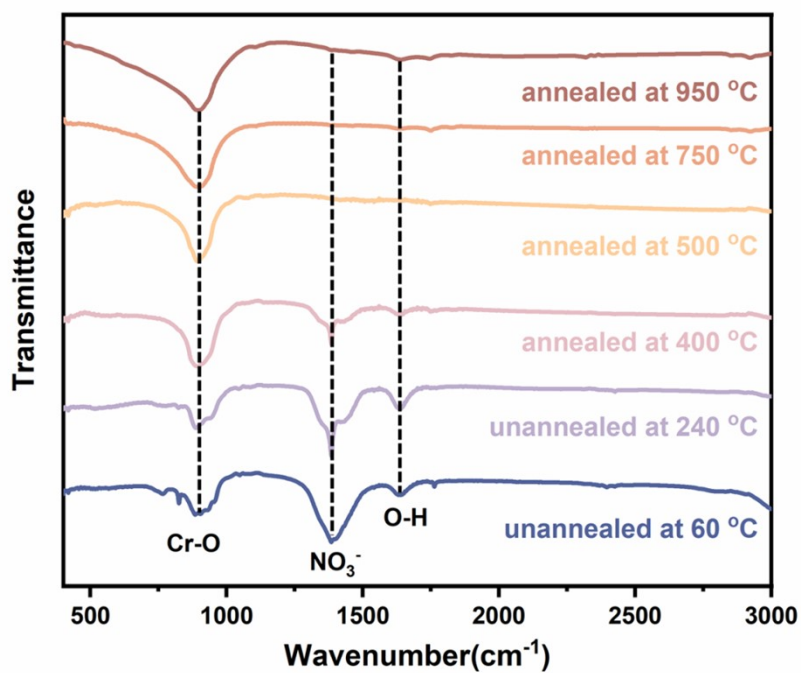

Figure S2. FT-IR spectra of  $\text{CaCrO}_4$  synthesized in different conditions.

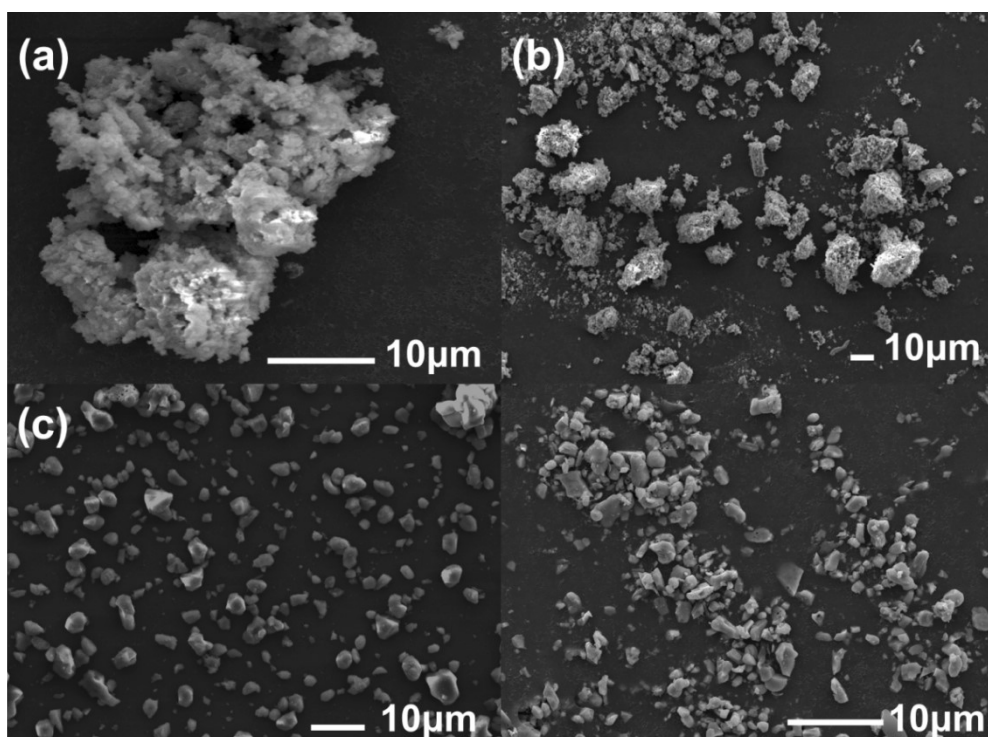

Figure S3. SEM graphs of  $\text{CaCrO}_4$  synthesized in different conditions: (a) as precipitated and dried at 60 °C, (b) dried at 110 °C, (c) dried at 240 °C, and (d) calcined at 500 °C.

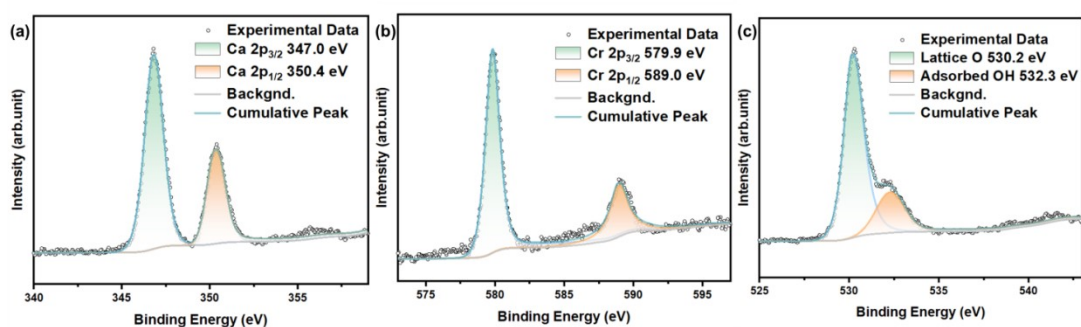

Figure S4. XPS core level binding energy spectra of Ca, O, Cr elements in  $\text{CaCrO}_4$  sample that was calcined at 750 °C.

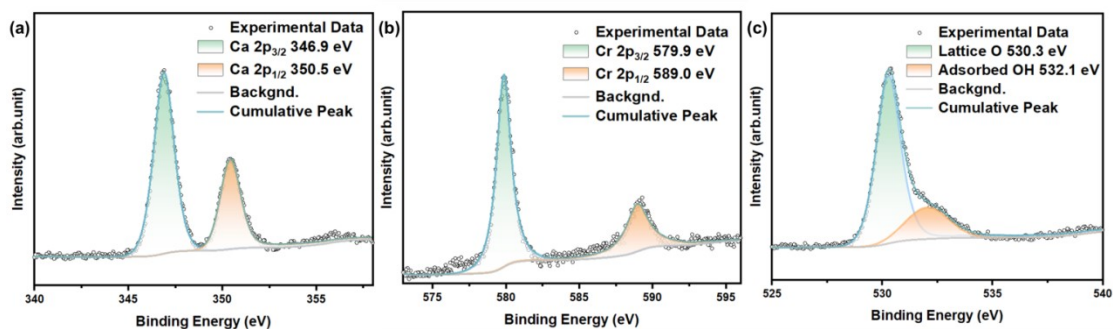

Figure S5. XPS core level binding energy spectra of Ca, O, Cr elements in  $\text{CaCrO}_4$  sample that was calcined at 500 °C.

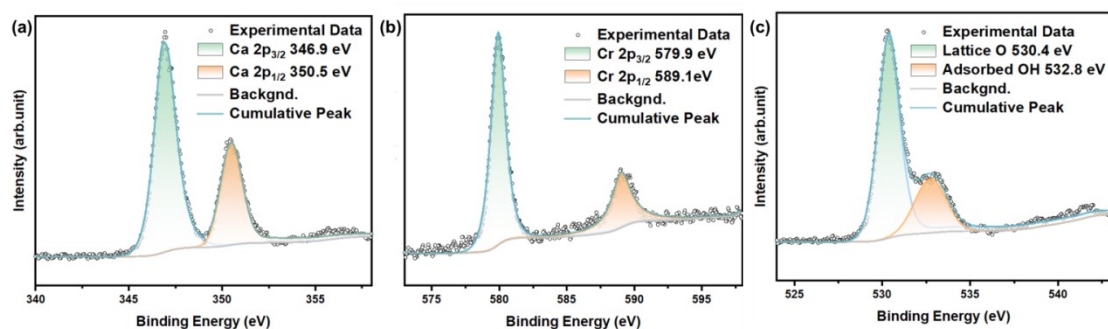

Figure S6. XPS core level binding energy spectra of Ca, O, Cr elements in  $\text{CaCrO}_4$  sample that was calcined at 400 °C.

Table S1 CIE-L\*a\*b\* parameters of zircon-type  $\text{CaCrO}_4$  at different temperature.

|         | Temperature | L* | a* | b* |
|---------|-------------|----|----|----|
| heating | 25          | 68 | -8 | 69 |
|         | 50          | 68 | -8 | 69 |
|         | 75          | 65 | -7 | 67 |
|         | 100         | 65 | -5 | 67 |
|         | 125         | 65 | -4 | 67 |
|         | 150         | 63 | 0  | 66 |
|         | 175         | 64 | 0  | 67 |
|         | 200         | 61 | 6  | 65 |
|         | 225         | 60 | 7  | 64 |
|         | 250         | 61 | 11 | 65 |
|         | 275         | 59 | 14 | 63 |
|         | 300         | 58 | 17 | 63 |
|         | 325         | 56 | 22 | 61 |
|         | 350         | 54 | 25 | 59 |
|         | 375         | 52 | 28 | 57 |
|         | 400         | 52 | 31 | 57 |
|         | 425         | 52 | 33 | 57 |
|         | 450         | 49 | 35 | 53 |
|         | 475         | 49 | 36 | 52 |
|         | 500         | 47 | 37 | 51 |
| cooling | 525         | 47 | 39 | 51 |
|         | 550         | 45 | 41 | 48 |
|         | 575         | 42 | 39 | 44 |
|         | 550         | 46 | 40 | 48 |
|         | 525         | 45 | 40 | 49 |
|         | 500         | 47 | 37 | 51 |
|         | 475         | 50 | 36 | 54 |

|  |     |    |    |    |
|--|-----|----|----|----|
|  | 450 | 50 | 35 | 55 |
|  | 425 | 51 | 33 | 56 |
|  | 400 | 54 | 31 | 59 |
|  | 375 | 54 | 29 | 59 |
|  | 350 | 54 | 26 | 60 |
|  | 325 | 58 | 21 | 62 |
|  | 300 | 58 | 19 | 63 |
|  | 275 | 59 | 15 | 64 |
|  | 250 | 60 | 12 | 64 |
|  | 225 | 61 | 8  | 64 |
|  | 200 | 61 | 5  | 64 |
|  | 175 | 62 | 2  | 65 |
|  | 150 | 64 | 0  | 67 |
|  | 125 | 65 | -2 | 67 |
|  | 100 | 65 | -4 | 67 |
|  | 75  | 67 | -6 | 69 |
|  | 50  | 69 | -8 | 70 |
|  | 25  | 68 | -7 | 70 |

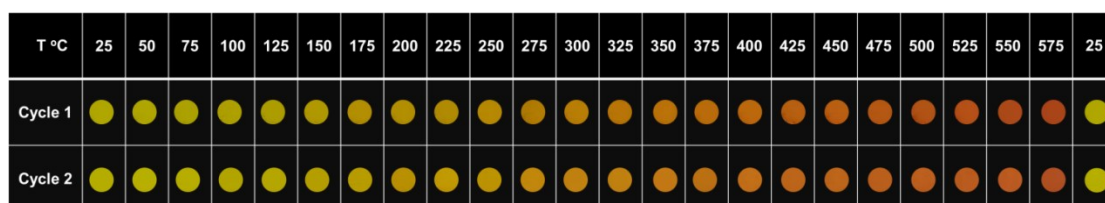

Figure S7. Digital photographs of the reversible thermochromism performance of  $\text{CaCrO}_4$  pigments between 25 and 575 °C.

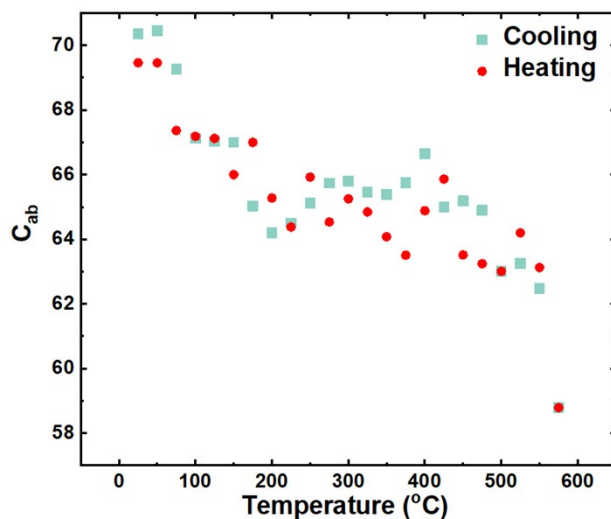

Figure S8. Chroma ( $C_{ab}$ ) evolution as a function of temperature of the  $\text{CaCrO}_4$  sample (calcined at 950 °C) in heating/cooling processes.

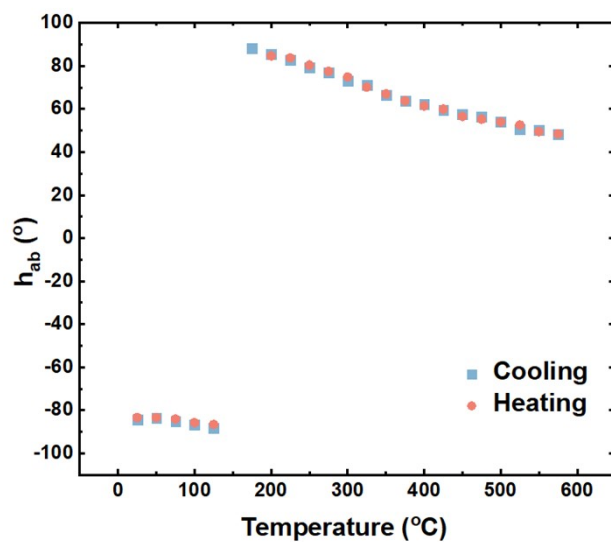

Figure S9. Hue angle evolution as a function of temperature of the  $\text{CaCrO}_4$  sample (calcined at 950 °C) in heating/cooling processes.

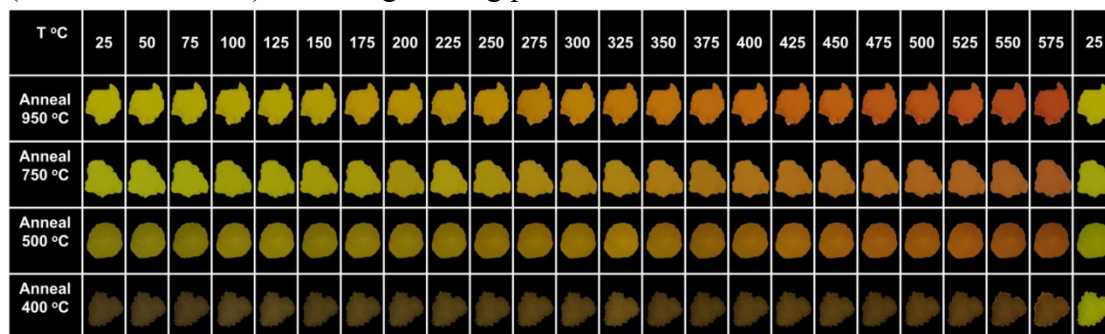

Figure S10. Digital photographs of the thermochromic  $\text{CaCrO}_4$  pigments synthesized at different calcination conditions in either heating or cooling processes.

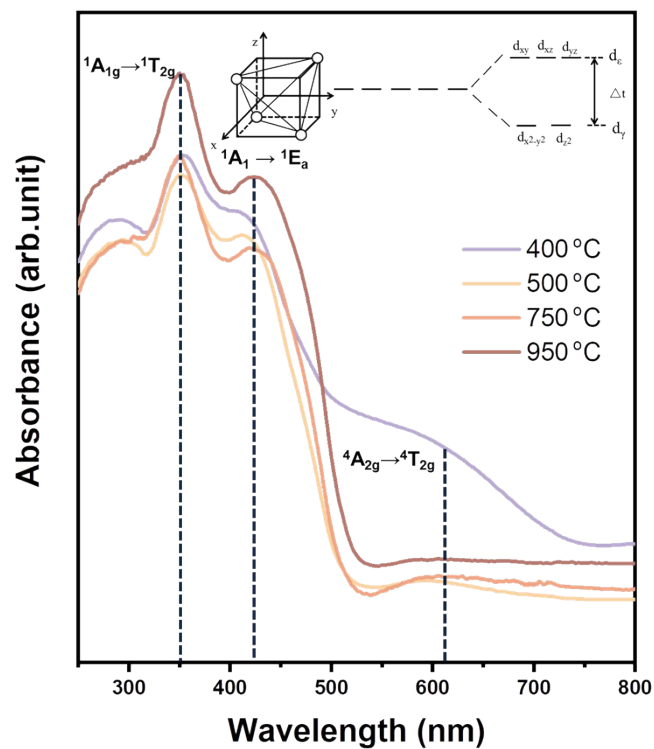

Figure S11. UV-vis absorption spectra of the  $\text{CaCrO}_4$  samples calcined at 400 °C, 500 °C, 750 °C, and 900 °C. Inset of the figure show the splitting of 3d orbitals of Cr in tetrahedral crystal field.

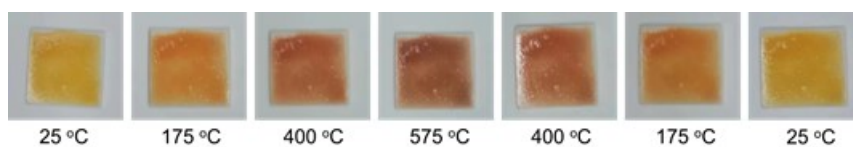

Figure S12. Thermochromic behavior of glazed  $\text{CaCrO}_4$  pigments on ceramic plate.

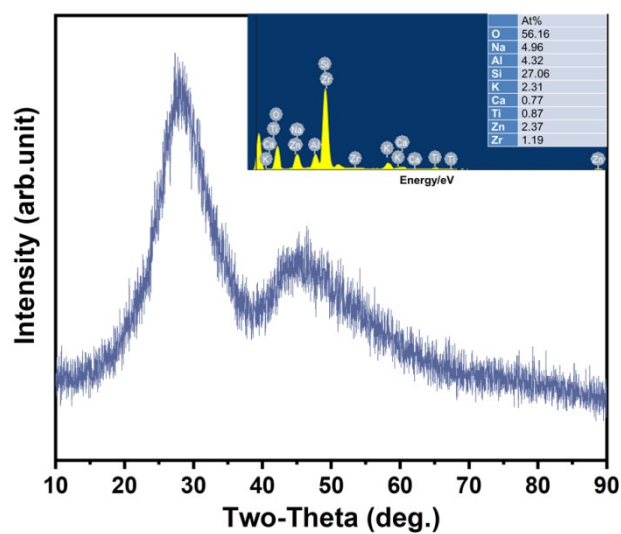

Figure S13. XRD and EDS of the low melting point glass powder.



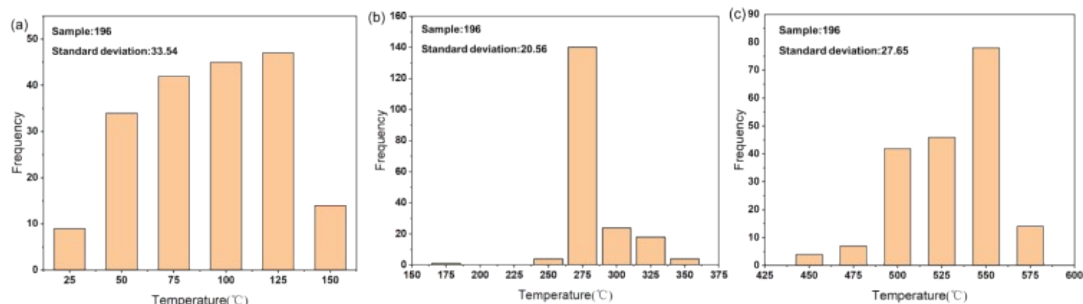

Figure S14. Readable accuracy of thermochromic markers in colorimetric questionnaire card of the thermochromic  $\text{CaCrO}_4$  pigment in different temperature range by the naked eye. (a) target temperature 125 °C, (b) target temperature 275 °C, (c) target temperature 550 °C.

### Colorimetric card questionnaire

Hello, everyone! We come from smart chromic material and device group, Jilin Normal University. We adhere to the innovative concept of technology serving life, aiming to develop highly sensitive color changing materials to serve people's production and life. The following image is a continuous reversible thermochromic color chart designed by us to help people recognize the oil temperature of a frying pan with their naked eyes. This color chart can help us master the "heat" of stir frying, avoid the "oily taste" caused by low-temperature stir frying and the carcinogenic substances such as benzo[a]pyrene caused by high-temperature heating, and help you and your family cook healthier and more delicious dishes. Please help us identify the color block corresponding to the following target colors and fill in the corresponding number in the blank. Your help is of great significance for the research of high-sensitivity oil temperature indicator color card materials and the daily dietary health of millions of households. Thank you everyone!

1. Please indicate the color block that is closest to the target color and fill in the number of that color block in the blank box. (Note: Only fill in the color block number that you think is closest to the target color) \_\_\_\_\_

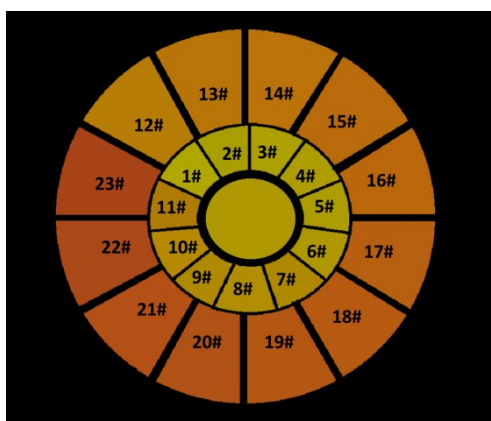



2. Please indicate the color block that is closest to the target color and fill in the number of that color block in the blank box. (Note: Only fill in the color block number that you think is closest to the target color) \_\_\_\_\_

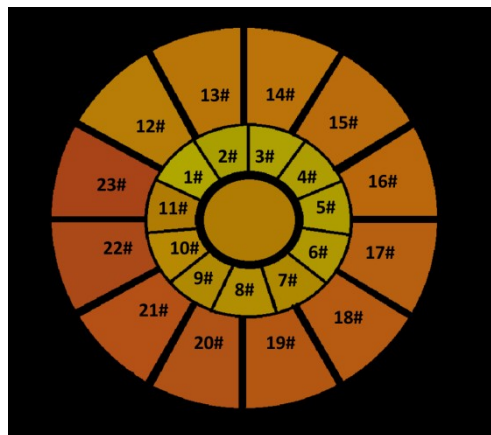

3. Please indicate the color block that is closest to the target color and fill in the number of that color block in the blank box. (Note: Only fill in the color block number that you think is closest to the target color) \_\_\_\_\_

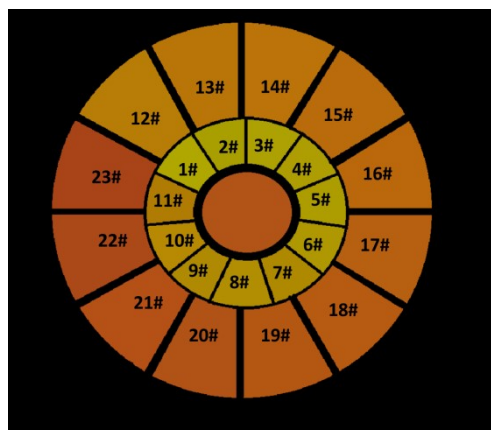

Supplement: d4qi03326d1.pdf [file d4qi03326d1.pdf]
